# Supplementary material for: Smad6-Mediated Suppression of TGF-β/BMP Signaling Facilitates Oocyte Extract-Induced Reprogramming
Source: Research Square preprint supplement (doi:10.21203/rs.3.rs-7671439/v1), 2025-11-20

Supplementary Figure S1. Functional enrichment analysis of differentially expressed genes (DEGs) during 0–2 hours of reprogramming

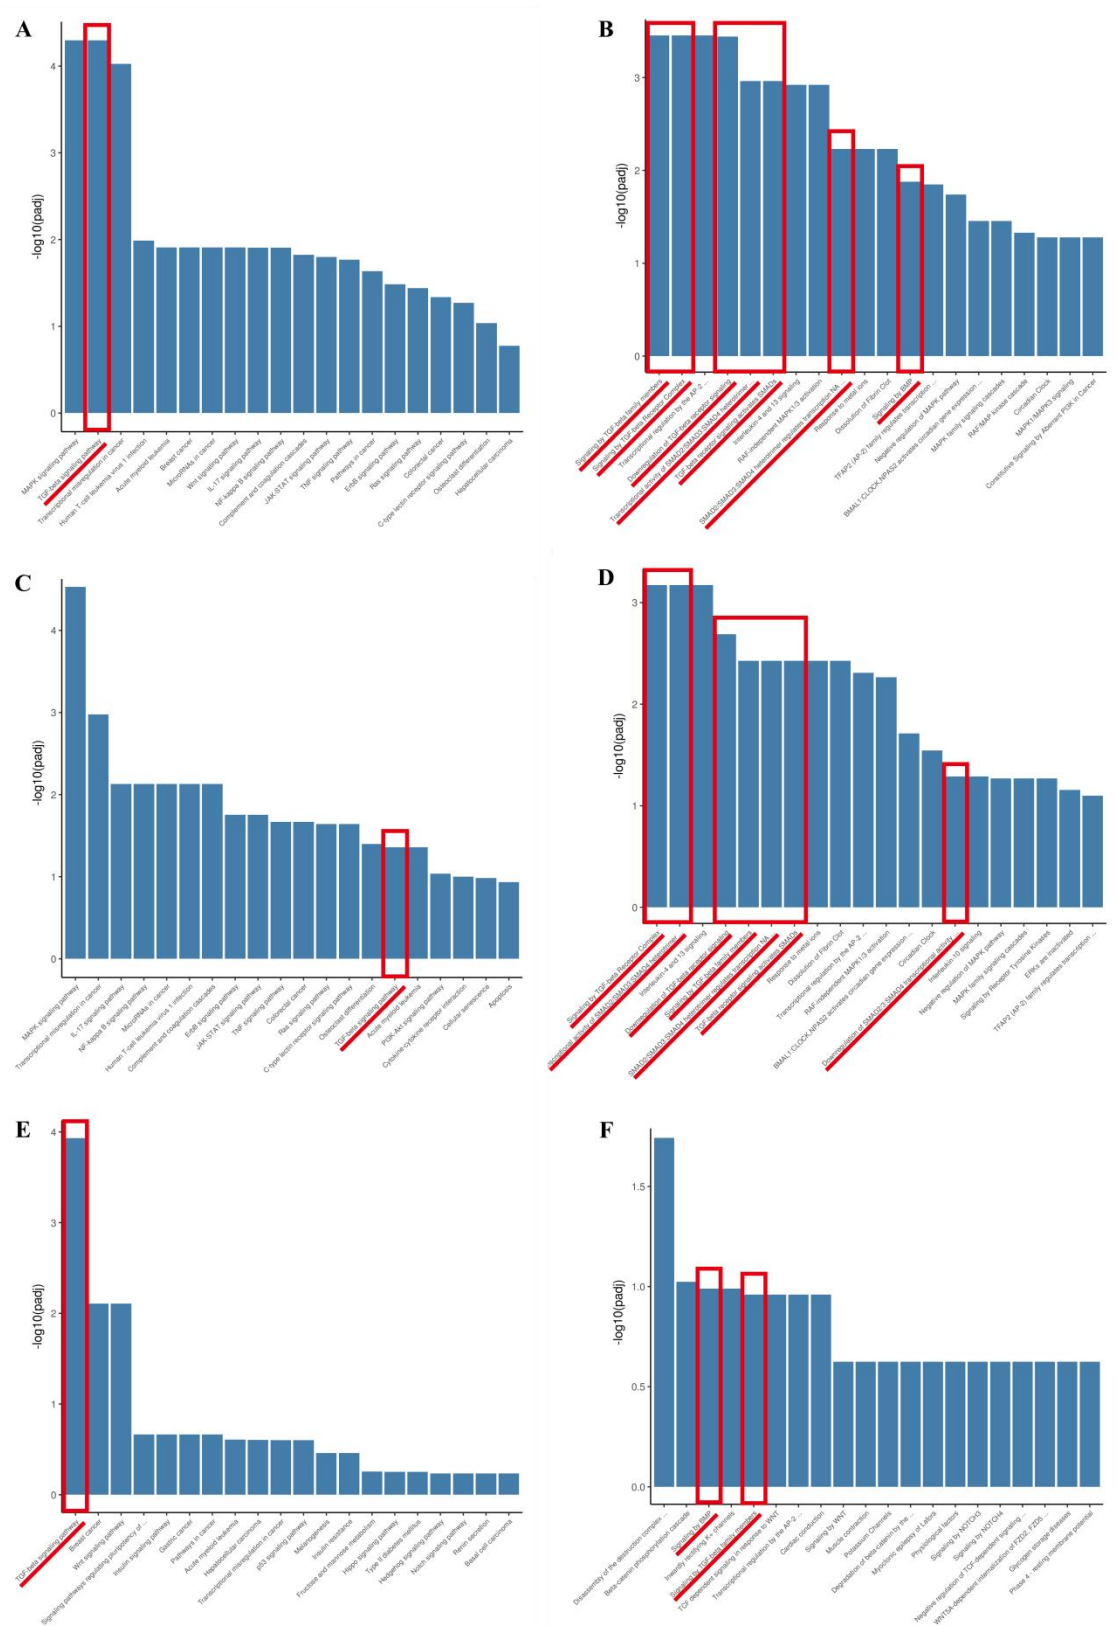

Supplementary Figure S2. Functional enrichment analysis of DEGs during 2–4 hours of reprogramming

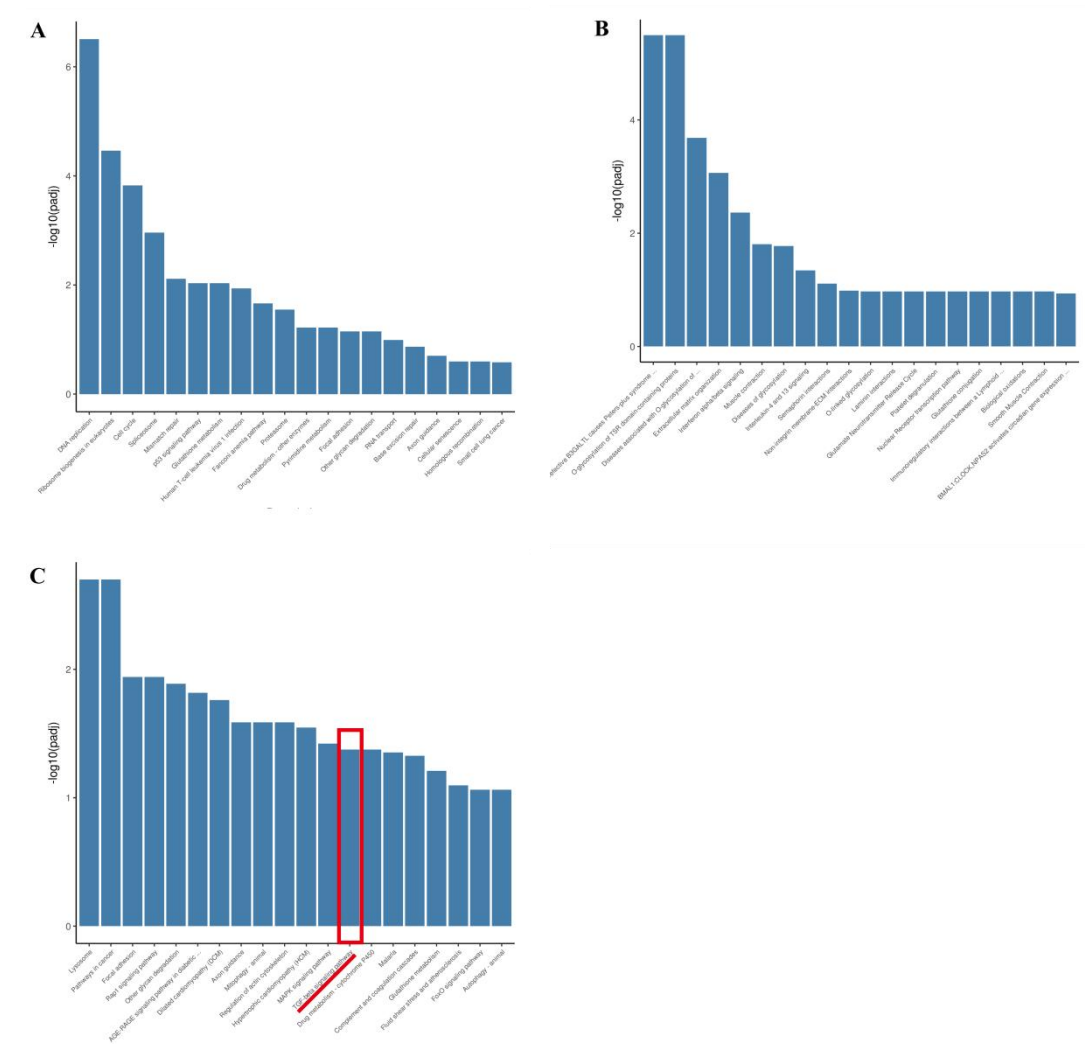

**Supplementary Figure S3. Functional enrichment analysis of DEGs during 4–12 hours of reprogramming**

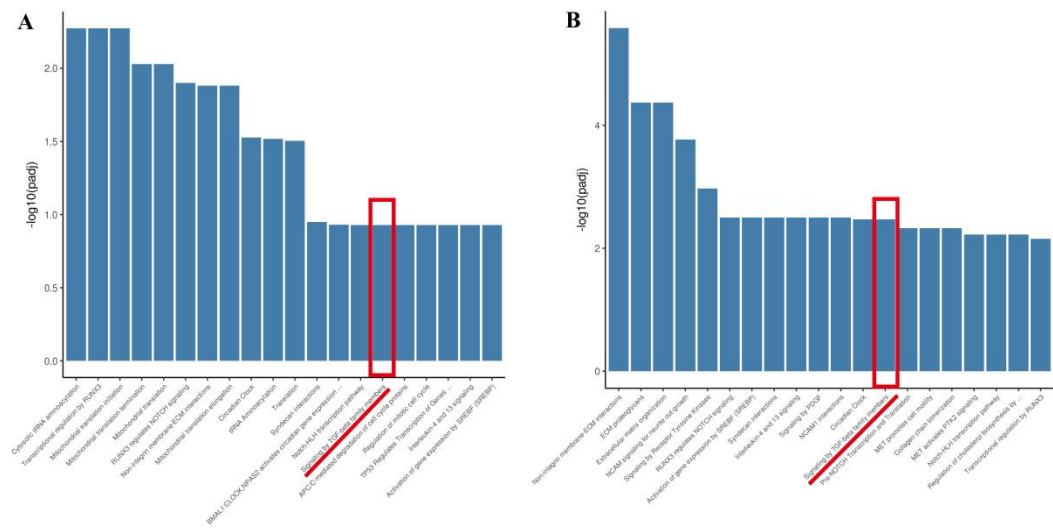

**Supplementary Figure S4. Functional enrichment analysis of DEGs during 12–24 hours of reprogramming**

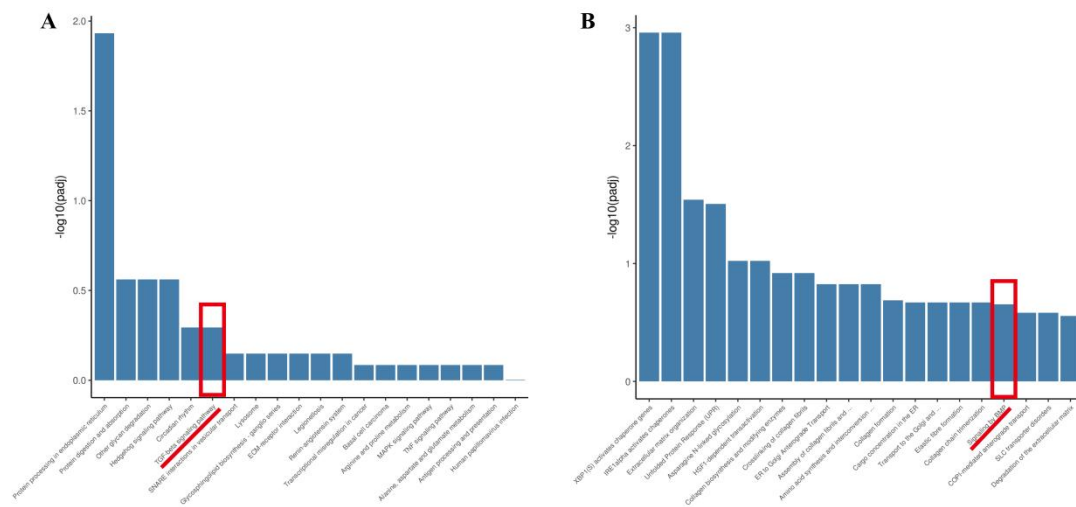

**Supplementary Figure S5. Functional enrichment analysis of DEGs during 24–48 hours of reprogramming**

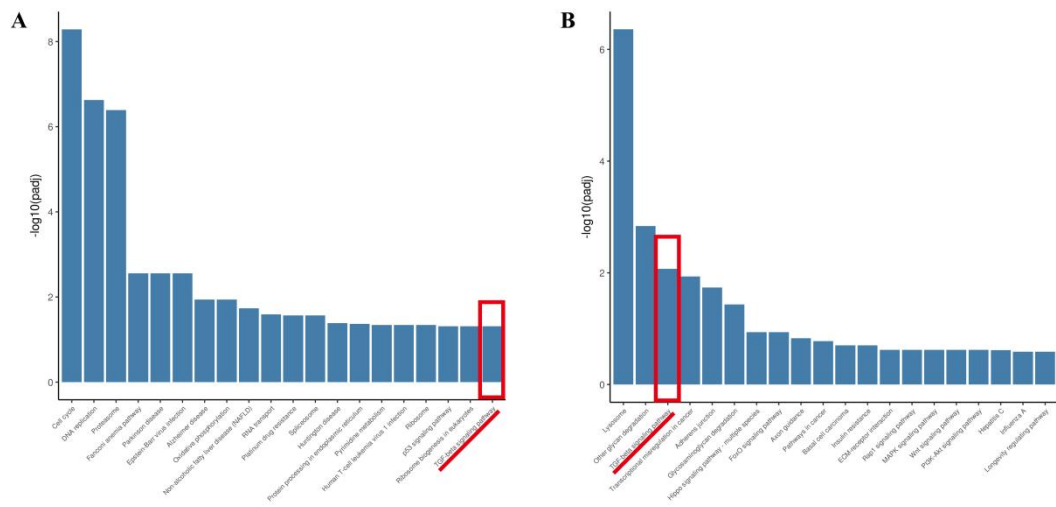

**Supplementary Figure S6. Functional enrichment analysis of DEGs during 48–72 hours of reprogramming**

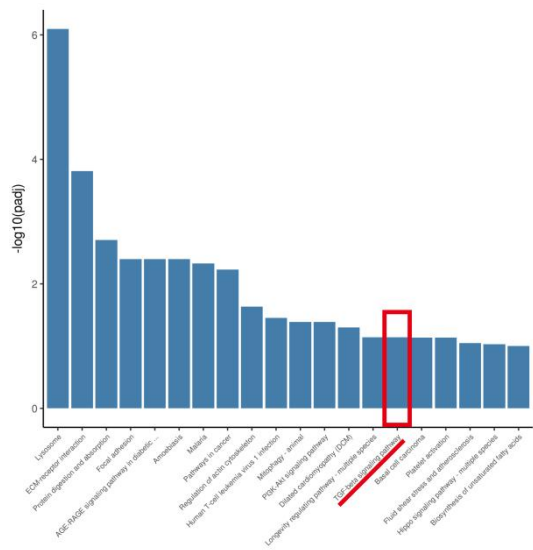

**Supplementary Figures S7-S15. Full-length blots.**

**Supplementary Figure S7. Full-length blot of Smad6**

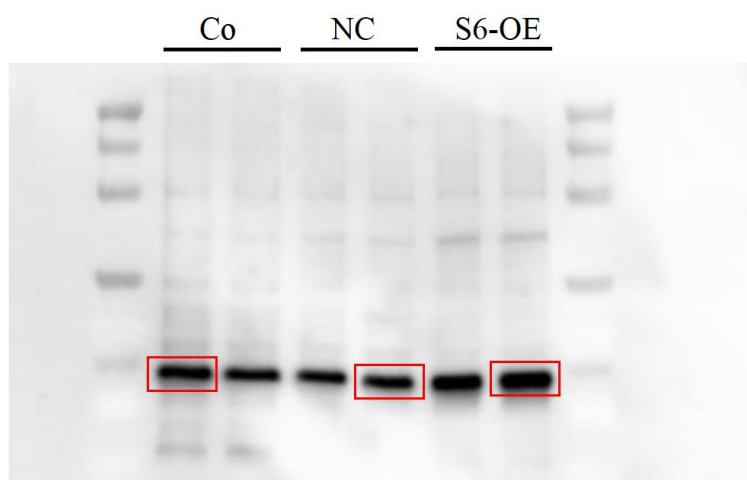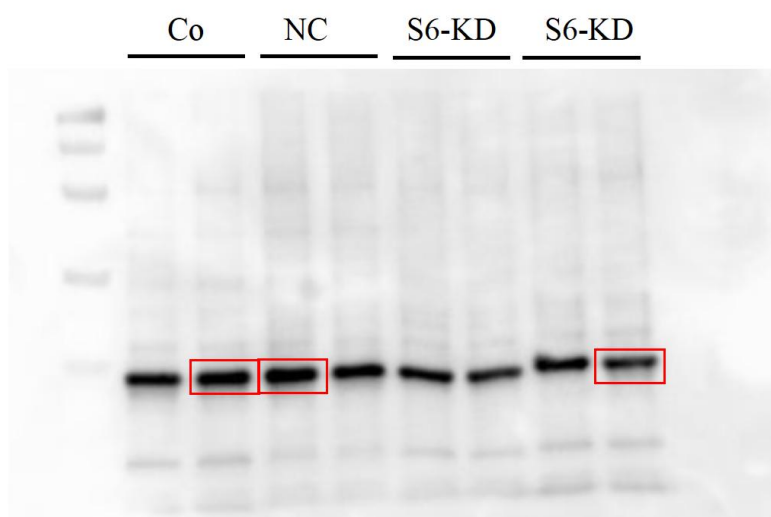

Supplementary Figure S8. Full-length blot of Nanog

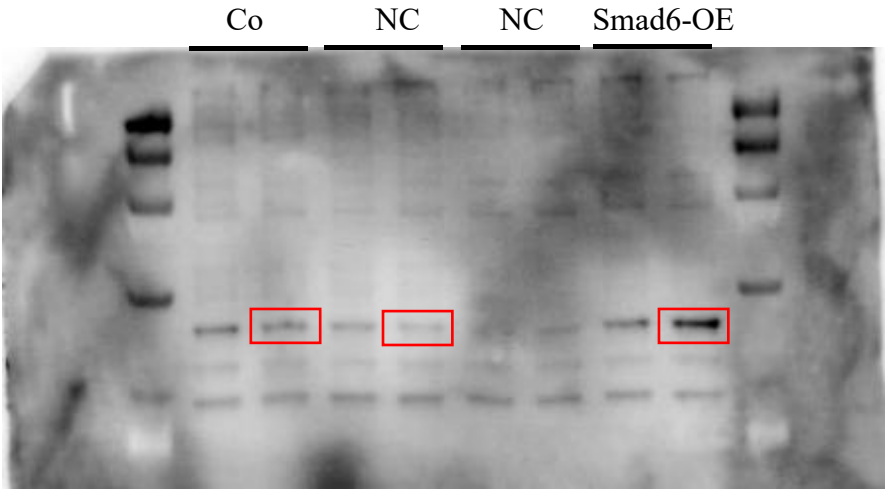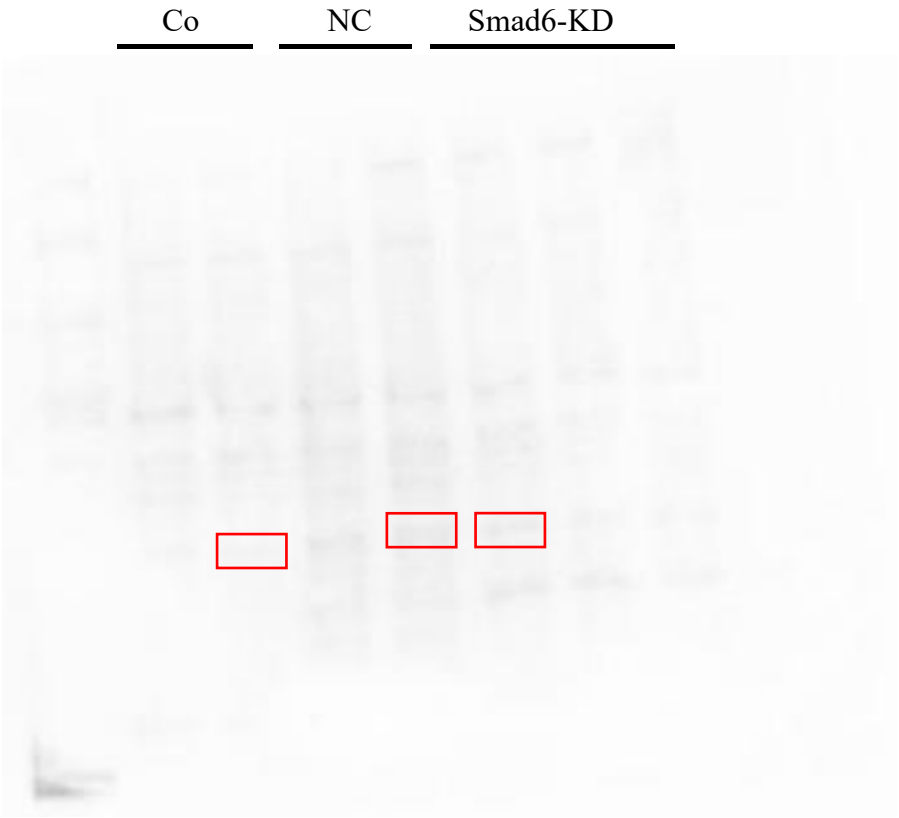



Supplementary Figure S9. Full-length blot of Oct4

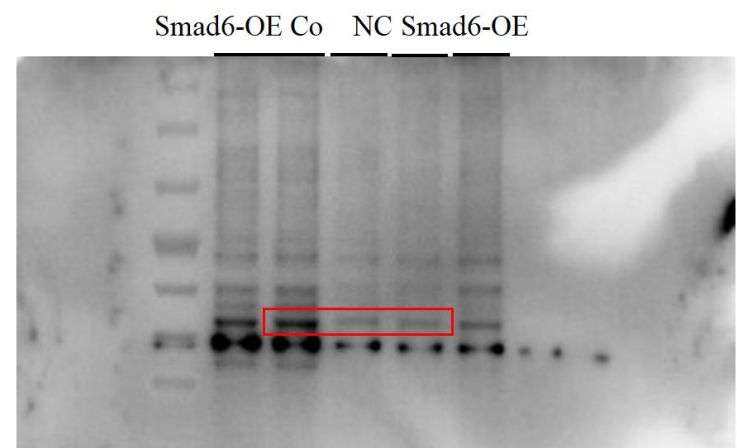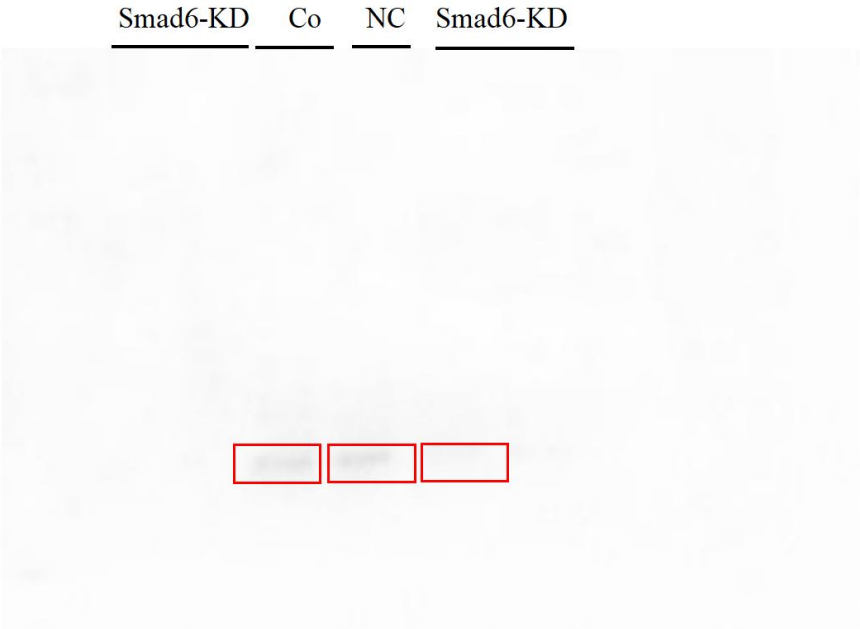

Supplementary Figure S10. Full-length blot of Sox2

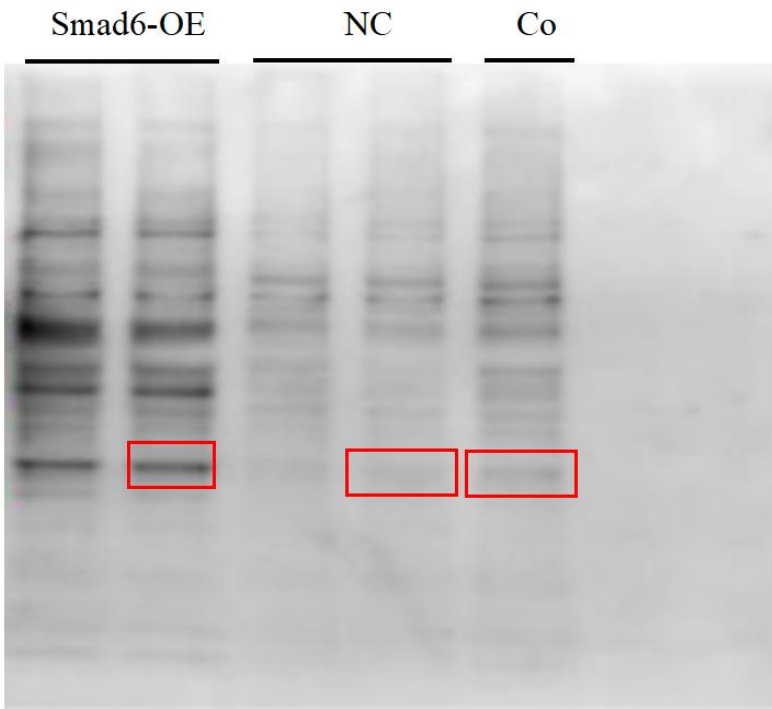

[\[A\] 提取文字](#) [更多 ▾](#)

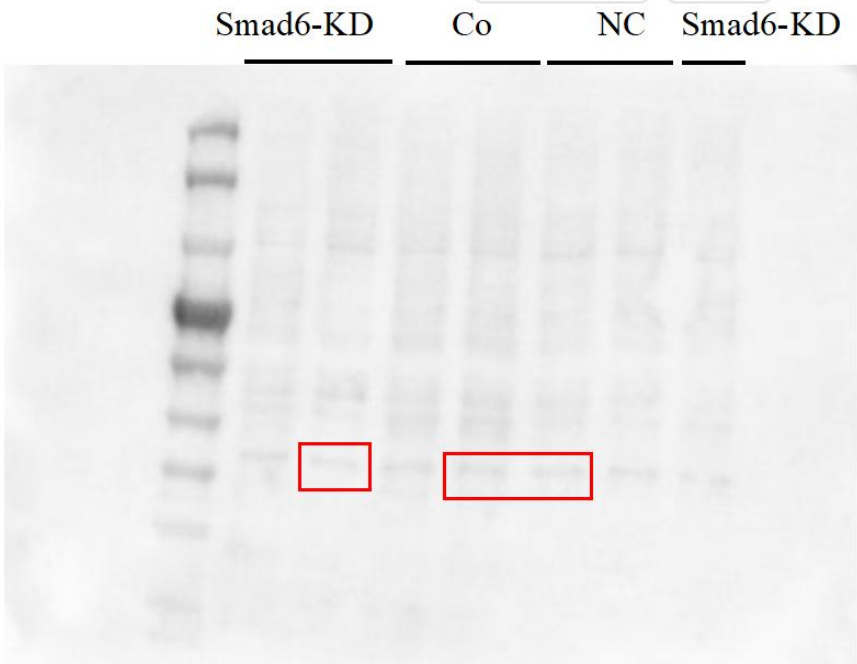

**Supplementary Figure S11. Full-length blot of Smad2/3**

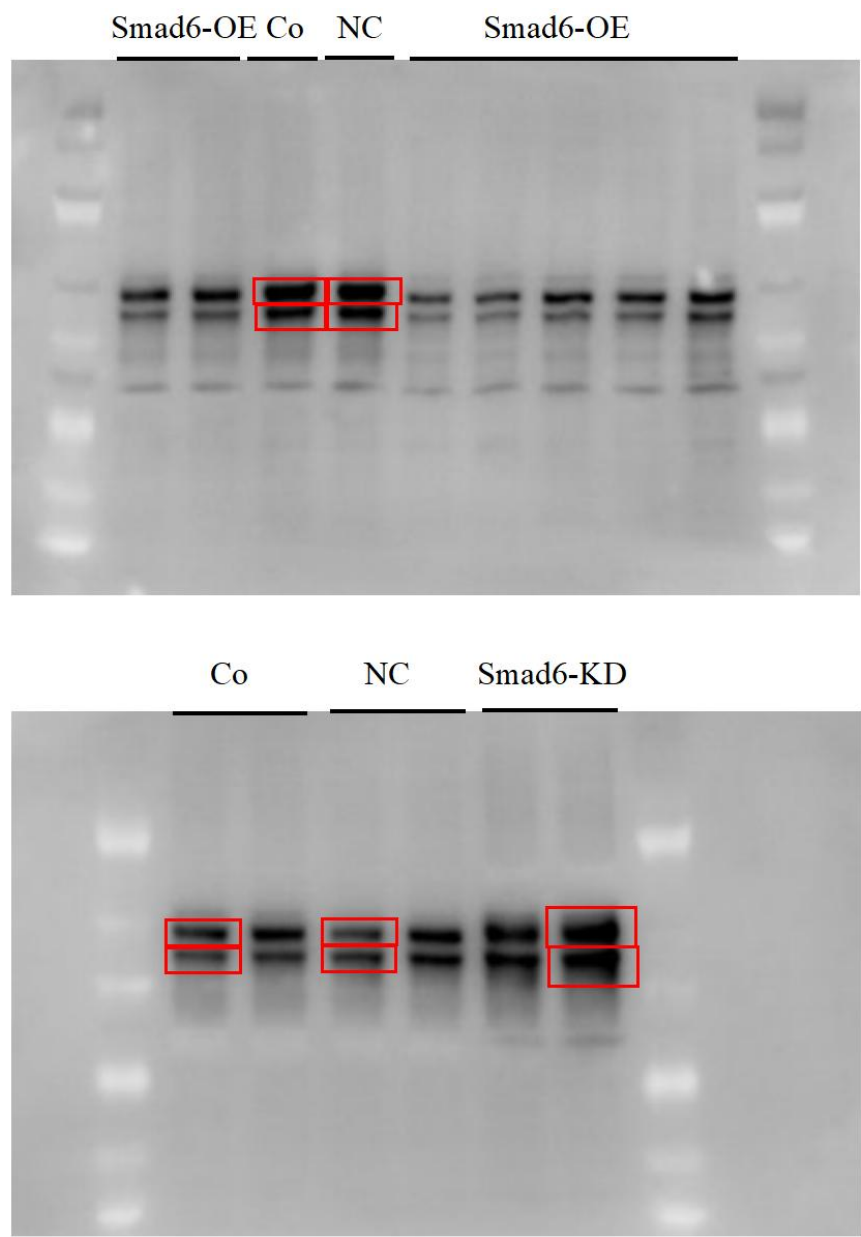

Supplementary Figure S12. Full-length blot of P-Smad2

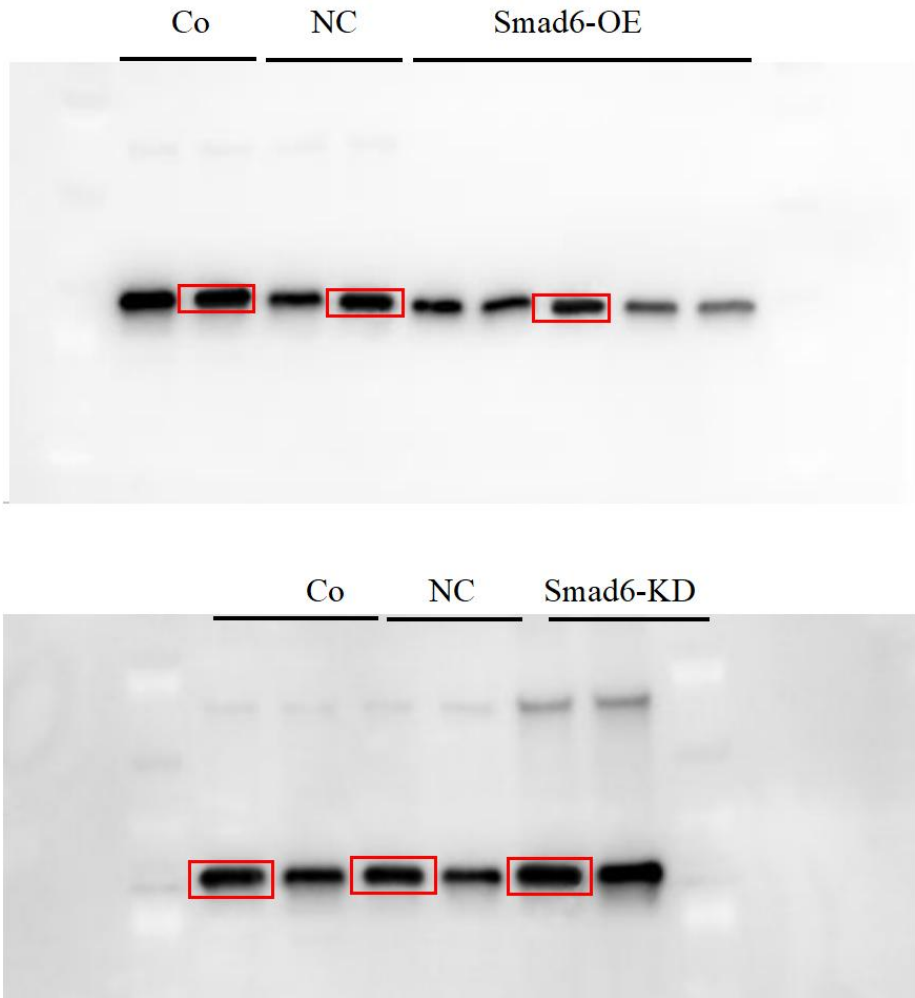

Supplementary Figure S13. Full-length blot of P-Smad3

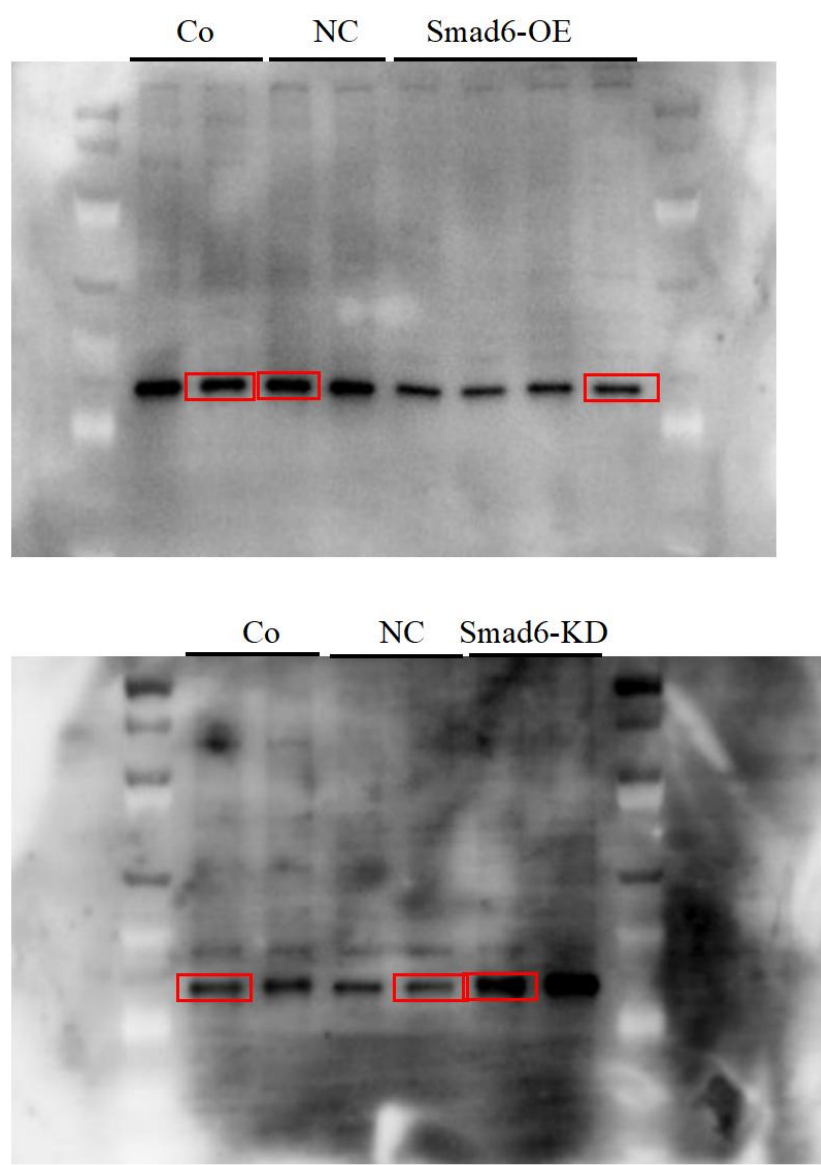

**Supplementary Figure S14. Full-length blot of Smad4**

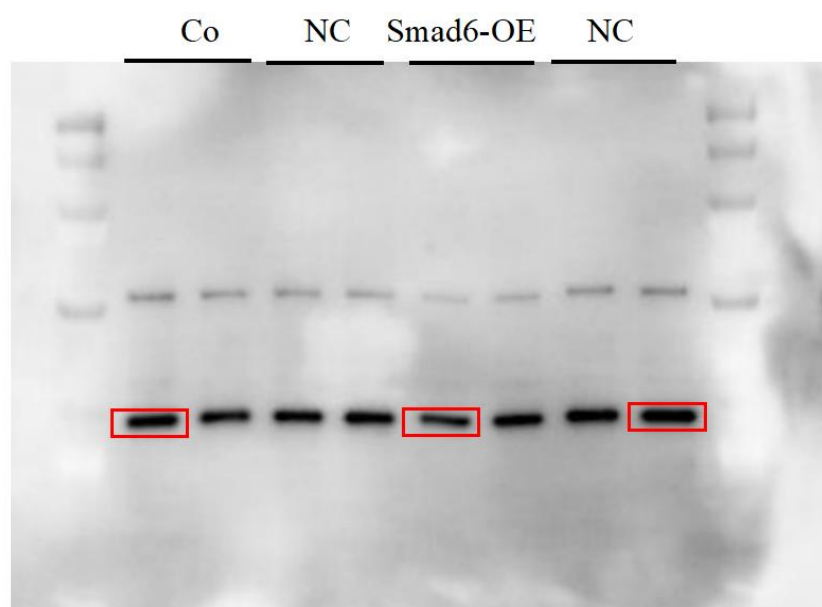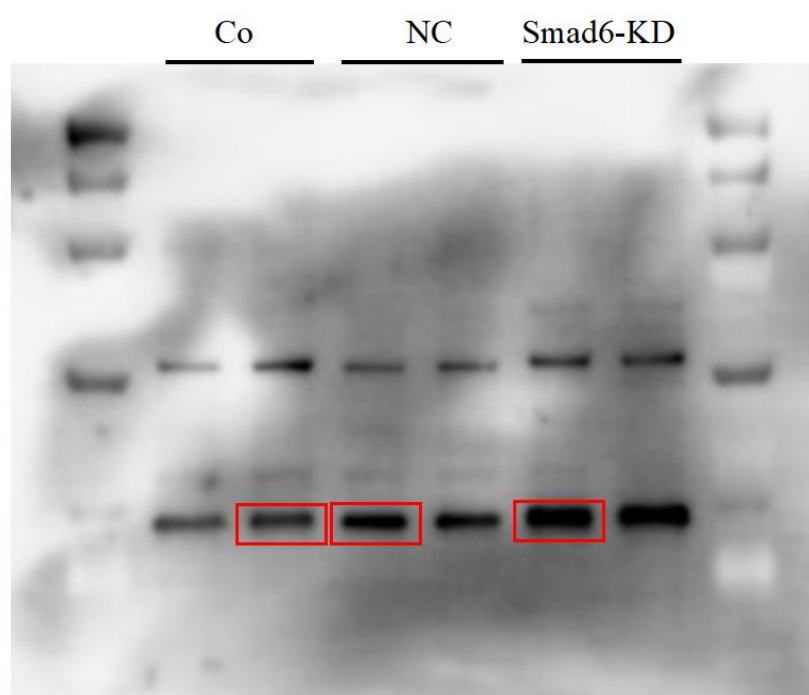

**Supplementary Figure S15. Full-length blot of Smad1/5/8**

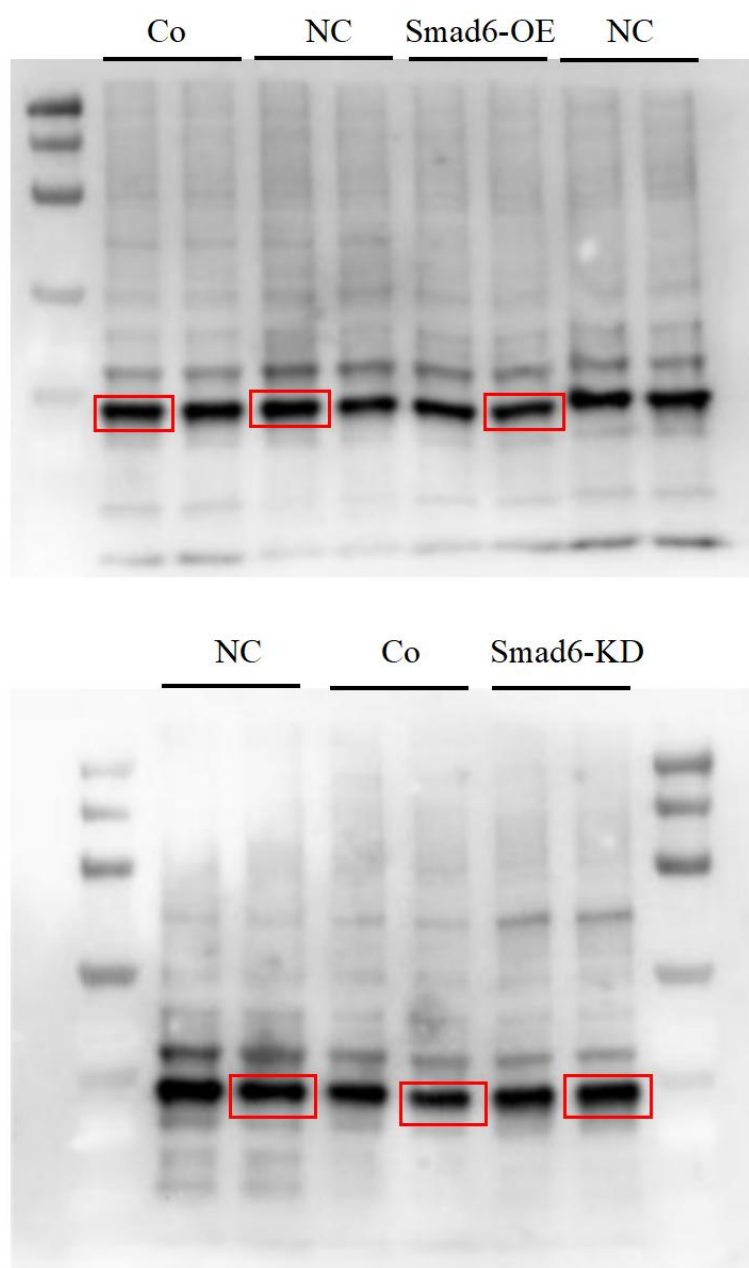

Supplement: Supplementary file 1 [file ac5e1093d2e6e226c1657158.pdf]
